27 **Abstract:**

28 Multiple GWAS have identified SNPs in the 8q24 locus near the *TRIB1* gene that  
29 significantly associate with plasma lipids and coronary artery disease. While subsequent studies  
30 have uncovered roles for hepatic and myeloid *Trib1* in contributing to either plasma lipids or  
31 atherosclerosis, the causal tissue for these GWAS associations remains unclear. The same  
32 8q24 SNPs significantly associate with plasma adiponectin levels in humans as well, suggesting  
33 a role for *TRIB1* in adipose tissue. Here, we report that adipocyte-specific *Trib1* knockout mice  
34 (*Trib1*\_ASKO) have increased plasma adiponectin levels and decreased plasma cholesterol and  
35 triglycerides. We demonstrate that loss of *Trib1* increases adipocyte production and secretion of  
36 adiponectin independent of the known *TRIB1* function of regulating proteasomal degradation.  
37 RNA-seq analysis of adipocytes and livers from *Trib1*\_ASKO mice suggests that alterations in  
38 adipocyte function underlie the plasma lipid changes observed in these mice. Secretomics and  
39 RNA-seq analysis revealed that *Trib1*\_ASKO mice have increased production of Lpl and  
40 decreased production of Angptl4 in adipose tissue, and fluorescent substrate assays confirm an  
41 increase in adipose tissue Lpl activity, which likely underlies the observed triglyceride  
42 phenotype. In summary, we demonstrate here a novel role for adipocyte *Trib1* in regulating  
43 plasma adiponectin, total cholesterol, and triglycerides in mice, confirming previous genetic  
44 associations observed in humans and providing a novel avenue through which *Trib1* regulates  
45 plasma lipids and coronary artery disease.

46

47

48

49

50

51

52

53 **Introduction:**

54 Plasma lipids, including triglycerides and cholesterol, are among the strongest risk  
55 factors for cardiovascular disease (CVD), and modulation of plasma lipid levels is among the  
56 most effective therapeutic strategies at combating atherosclerotic CVD. Multiple genome-wide  
57 association studies (GWAS) investigating cardiometabolic risk factors have identified SNPs in  
58 the 8q24 genomic locus that associate with plasma triglycerides (TGs), total cholesterol (TC),  
59 LDL-cholesterol (LDL-C), HDL-cholesterol (HDL-C), and coronary artery disease (CAD) [1-6],  
60 suggesting that this locus contains elements that regulate lipid metabolism and disease risk.  
61 These SNPs lie ~40kb downstream of the Tribbles1 (*TRIB1*) gene, which codes for the TRIB1  
62 pseudokinase. Studies in multiple genetic mouse models have since confirmed a role for both  
63 hepatic and macrophage *Trib1* in the regulation of lipid metabolism and CVD [7-9]. Viral  
64 mediated liver-specific overexpression of *Trib1* in mice was found to decrease plasma  
65 cholesterol and TGs, and hepatic deletion of *Trib1* increased plasma cholesterol and TG, while  
66 also causing hepatic steatosis due to increased *de novo* lipogenesis [7]. This latter phenotype  
67 confirmed an additional GWAS association between the 8q24 SNPs and circulating liver  
68 transaminases (ALTs/ASTs) [10], suggestive of a role for *TRIB1* in steatosis and hepatocellular  
69 health. A more recent study found that myeloid-specific *Trib1* knockout mice have reduced  
70 atherosclerotic burden [9] due to decreased OxLDL uptake by macrophages and reduced foam  
71 cell formation, highlighting the importance of tissue-specific gene functions as well as raising the  
72 question of possible roles for *Trib1* in other tissues in mediating the GWAS associations.

73 The same SNPs in the 8q24 locus that associate with plasma lipid traits, CAD, and ALTs  
74 have been found to additionally associate with plasma adiponectin levels in humans [11]  
75 (**Supplementary Figure 1**). Adiponectin is an adipokine, or signaling molecule secreted from  
76 adipocytes, that acts predominantly as an insulin sensitizing agent [12] but can also alter  
77 plasma lipids [13], hepatic fat content [14], and even CAD [15]. Given the 8q24 association and  
78 the fact that adiponectin is exclusively produced in adipocytes, we hypothesized that *TRIB1*

79 plays a role in adipose tissue biology. Additionally, the myriad of roles for adiponectin in  
80 regulating cardiometabolic traits begs the question of whether the function of Trib1 in adipocytes  
81 is responsible for the observed metabolic genetic associations. Here, we report the first  
82 adipocyte-specific *Trib1* knockout mouse and show that these mice have increased plasma  
83 adiponectin levels and decreased plasma cholesterol and TG levels. Further mechanistic  
84 studies reveal that *Trib1* regulates plasma adiponectin through increased adiponectin  
85 production and secretion, and that *Trib1* modulates plasma TG clearance through regulation of  
86 adipose-specific lipoprotein lipase (Lpl) activity.

87

## 88 **Results:**

### 89 ***Adipocyte-specific Trib1 knockout does not alter body weight, adiposity, or adipose*** 90 ***inflammation***

91 We generated *Trib1* adipocyte-specific knockout (Trib1\_ASKO) mice by crossing  
92 previously described Trib1-floxed (Trib1<sub>fl/fl</sub>) C57BL/6 mice [7] with transgenic mice expressing  
93 Cre recombinase under the adipocyte-specific *Adipoq* promoter. Efficient *Trib1* deletion in  
94 adipose tissue of Trib1\_ASKO mice was confirmed by qPCR in both subcutaneous white  
95 adipose tissue (scWAT) (**Figure 1a**) and brown adipose tissue (BAT) (**Figure 1b**), and we did  
96 not detect any compensatory changes in *Trib2* or *Trib3* expression in scWAT (**Figure 1a**). Trib1  
97 message was unchanged in other tissues, including the livers (**Figure 1b**) of Trib1\_ASKO mice,  
98 confirming specificity of the model. Chow-fed Trib1\_ASKO mice had similar overall body weight  
99 and fat pad mass to Trib1<sub>fl/fl</sub> mice (**Figure 1c,d**), and there was no difference in adipocyte  
100 morphology or size as measured by H&E staining and subsequent morphometric analysis  
101 (**Figure 1e**). Similar results were observed in mice fed a 45% kcal high-fat diet (HFD) for 12  
102 weeks (**Figure 1f,g**).

103 To better understand the effects of *Adipoq*-Cre mediated knockout of *Trib1* in  
104 adipocytes, we utilized an *in vitro* model of adipocyte culture, where we isolated the stromal

105 vascular fraction (SVF) from the scWAT of Trib1<sub>fl/fl</sub> and Trib1<sub>ASKO</sub> mice and differentiated  
106 them to adipocytes. Consistent with the lack of an adiposity phenotype in the adult mice, SVF-  
107 derived adipocytes from Trib1<sub>fl/fl</sub> and ASKO mice differentiated similarly, as assessed by time  
108 course gene expression of adipogenic markers *Pparg*, *Cebpa*, and *Adipoq*, as well as by cellular  
109 morphology and lipid accumulation (**Supplemental Figure 2**). Importantly, *Trib1* expression in  
110 adipocytes derived from ASKO mice was lower relative to adipocytes derived from Trib1<sub>fl/fl</sub>  
111 mice (**Supplemental Figure 2a**), demonstrating that *Adipoq*-Cre is efficiently expressed in the  
112 *in vitro* setting upon differentiation.

113 A previous study reported that Trib1 haploinsufficiency in mice impairs the upregulation  
114 of inflammatory genes in adipose in response to proinflammatory stimuli such as LPS, TNF- $\alpha$ ,  
115 and high-fat diet feeding [16]. Given the known contribution of adipose tissue inflammation to  
116 obesity and metabolic disease, we checked if Trib1<sub>ASKO</sub> mice had decreased inflammatory  
117 markers in adipose. We measured inflammatory gene expression in adipose tissue in both  
118 chow-fed and HFD-fed conditions and observed no difference between the groups in either diet  
119 setting (**Supplemental Figure 3a,b**). Similarly, we did not observe any changes in the  
120 transcriptional response to TNF- $\alpha$  treatment in SVF-derived adipocytes from Trib1<sub>ASKO</sub> mice  
121 compared to Trib1<sub>fl/fl</sub> controls (**Supplemental Figure 3c**). These data suggest that the  
122 phenotypes we have observed in our mice are not due to changes in adipose inflammation.

123  
124 ***Adipocyte-specific Trib1 knockout mice have increased plasma adiponectin and***  
125 ***decreased plasma lipids***

126 Given the association in humans between SNPs near *TRIB1* and plasma adiponectin,  
127 we first sought to determine if Trib1<sub>ASKO</sub> mice had altered circulating adiponectin levels. We  
128 found that both male and female Trib1<sub>ASKO</sub> mice on chow diet have significantly increased  
129 plasma adiponectin (>20%) levels compared to wild-type counterparts (**Figure 2a**). The  
130 increase in plasma adiponectin was not accompanied by detectable changes in adiponectin

131 message levels in the scWAT or visceral adipose tissue (VAT) (**Figure 2b**), suggesting a  
132 posttranscriptional role for Trib1 in plasma adiponectin regulation. We checked the plasma  
133 levels of other adipokines and found that plasma resistin levels were also increased in  
134 Trib1\_ASKO mice (**Figure 2c**). However, plasma levels of leptin, another abundant adipokine,  
135 were not significantly changed in Trib1\_ASKO mice (**Figure 2d**), demonstrating that Trib1  
136 regulates the secretion of specific adipokines and not global adipokine secretion. Despite  
137 increased adiponectin levels, glucose tolerance was not significantly changed in 8–12-week-old  
138 chow-fed mice (**Figure 2e**), and SVF-derived adipocytes did not demonstrate increased insulin  
139 signaling upon insulin stimulation (**Supplemental Figure 4a**). HFD-fed Trib1\_ASKO mice  
140 maintained increased adiponectin levels (**Figure 2f**), and, in contrast to chow-fed mice, these  
141 mice also had significantly improved glucose tolerance (**Figure 2g**) as well as decreased fasting  
142 plasma insulin levels (**Supplemental Figure 4b**), consistent with studies that show association  
143 between increased plasma adiponectin levels and improved insulin sensitivity [12].

144 Since the same SNPs in the 8q24 locus significantly associate with both plasma  
145 adiponectin and plasma lipids (LDL-C, HDL-C, and TG), we next asked if adipocyte *Trib1*  
146 contributes to plasma lipid regulation. We found that chow-fed Trib1\_ASKO mice display  
147 decreased plasma TG (>28%) and TC (15%) levels compared to wild-type counterparts (**Figure**  
148 **3a,b**), demonstrating a role for adipocyte *Trib1* in plasma lipid regulation. We note that this  
149 phenotype of decreased plasma lipids is the opposite direction of the effect of the liver-specific  
150 knockout of *Trib1*, which results in increased plasma lipids [7], demonstrating opposing tissue-  
151 specific roles for Trib1 in regulating plasma lipids. FPLC analysis of pooled plasma revealed  
152 that Trib1\_ASKO mice have reduced cholesterol in the HDL fraction as well as decreased TGs  
153 in both the VLDL and LDL fractions (**Figure 3c,d**). Trib1\_ASKO mice continue to demonstrate  
154 lower total plasma cholesterol when placed on HFD for 12 weeks, although TGs normalized to  
155 WT levels (**Figure 3e,f**). To test for involvement of the LDL receptor in the cholesterol  
156 phenotype, we crossed the Trib1\_ASKO mice to Ldlr KO mice. While plasma TGs did not differ

157 between the groups (**Figure 3g**), we found that Trib1\_ASKO Ldlr KO mice on chow diet had  
158 significantly decreased total cholesterol compared to Trib1<sub>fl/fl</sub> Ldlr KO mice (**Figure 3h**),  
159 demonstrating that the cholesterol phenotype is at least partially independent of the LDL  
160 receptor pathway. FPLC analysis of pooled plasma from Trib1\_ASKO; Ldlr KO mice on chow  
161 diet further revealed decreased cholesterol levels in both the LDL and HDL fractions in ASKO  
162 mice (**Figure 3i**).

163

### 164 ***Trib1 in adipocytes regulates adiponectin secretion in a posttranscriptional and*** 165 ***proteasome-independent mechanism***

166 Since plasma adiponectin levels were increased in Trib1\_ASKO mice, we hypothesized  
167 that *Trib1* deficiency in adipocytes promotes increased adiponectin secretion. To test this  
168 hypothesis, we investigated adiponectin protein expression and secretion from SVF-derived  
169 adipocytes from Trib1<sub>fl/fl</sub> and Trib1\_ASKO scWAT. Consistent with observations in whole  
170 adipose tissue, adiponectin mRNA expression was unchanged in SVF-derived adipocytes  
171 (**Figure 4a**). However, adiponectin was increased in the conditioned media above adipocytes  
172 derived from Trib1\_ASKO SVF compared to Trib1<sub>fl/fl</sub> SVF (**Figure 4b**), confirming increased  
173 adiponectin secretion. This was also accompanied by a clear increase in intracellular  
174 adiponectin protein levels (**Figure 4c**), suggesting that increased secretion is in part due to  
175 increased cellular adiponectin protein levels, despite the lack of a transcriptional change.

176 We next asked whether *Trib1* overexpression in adipocytes would also have an effect on  
177 adiponectin secretion and intracellular protein. We generated a doxycycline-inducible 3xFlagHA-  
178 tagged *Trib1* overexpression 3T3-L1 stable cell line that was able to overexpress *Trib1* >100-  
179 fold over wild-type values (**Figure 4d**). We found that Trib1 protein was not detectable in these  
180 cells via western blot unless the cells were first treated with the proteasome inhibitor MG132,  
181 suggesting that Trib1 is unstable and undergoes rapid proteasomal degradation (**Figure 4e**) in  
182 3T3-L1 cells. To avoid differences in cell line differentiation capacity caused by selection, we

183 ultimately used lentiviral delivery of *Trib1* and eGFP expressed under the CMV promoter in  
184 mature 3T3-L1 adipocytes to assess the effects of *Trib1* overexpression in culture. We achieved  
185 >60-fold overexpression of *Trib1* via this method, but observed no changes in adiponectin  
186 secretion or protein levels compared to the GFP control (**Figure 4f-i**). Thus, while we were able  
187 to show that *Trib1* deficiency robustly affects adiponectin protein and secretion in adipocytes,  
188 we were unable to produce any effect on adiponectin with *Trib1* overexpression *in vitro*.

189 To better understand the molecular function of Trib1 in adipose tissue and how it may be  
190 regulating adiponectin, we first investigated previously reported functions of Trib1 described in  
191 other models. As a pseudokinase, Trib1 lacks catalytic phosphorylation activity, and is instead  
192 understood to function as a scaffolding protein that mediates interactions between its binding  
193 partners [17]. In this regard, Trib1 is best known for its role in the proteasomal degradation of  
194 the transcription factor C/EBP $\alpha$  via mediating its ubiquitination by the COP1 E3 ubiquitin ligase  
195 [18]. In keeping with that function, we found that C/EBP $\alpha$  protein levels were increased in the  
196 adipose tissue of Trib1\_ASKO mice (**Figure 5a**) without observable changes in *Cebpa* message  
197 levels (**Figure 5b, Supplemental Figure 2c**). Although C/EBP $\alpha$  is a known transcriptional  
198 regulator of adiponectin expression [19], we did not observe a consistent increase in  
199 adiponectin expression in either tissue or SVF-derived adipocytes (**Figure 2b, Figure 4a**),  
200 consistent with *Trib1* regulating adiponectin through a mechanism independent of C/EBP $\alpha$ -  
201 mediated transcription.

202 Given Trib1's role in mediating ubiquitination of proteins for proteasomal degradation, we  
203 further asked if the proteasome was important in Trib1's regulation of C/EBP $\alpha$  and adiponectin.  
204 We treated Trib1\_ASKO and Trib1 $_{fl/fl}$  SVF-derived adipocytes with MG132 to determine if  
205 proteasomal inhibition would increase C/EBP $\alpha$  and adiponectin protein levels in the control cells  
206 but not the KO cells, normalizing the protein levels between the two. We found that MG132  
207 treatment did normalize C/EBP $\alpha$  protein levels (**Figure 5c**) between the two groups, consistent  
208 with the known function of Trib1 regulating C/EBP $\alpha$  degradation. However, MG132 treatment



209 did not affect the difference in adiponectin secretion (**Figure 5d**) or protein levels (**Figure 5c**)  
210 between control and ASKO cells, suggesting that *Trib1* is regulating adiponectin through a  
211 proteasome and C/EBP $\alpha$ -independent pathway.

212

213 ***RNA-sequencing of adipocytes and hepatocytes reveals a primary role for adipose tissue***  
214 ***in altered plasma lipid metabolism in Trib1\_ASKO mice***

215 To understand the mechanism by which adipocyte-specific *Trib1* regulates plasma lipids,  
216 we sequenced RNA from adipocytes isolated from the scWAT of Trib1 $_{fl/fl}$  and Trib1\_ASKO  
217 mice. Differential expression analysis revealed over 2000 genes that were differentially  
218 expressed at a greater than 2-fold change (**Figure 6a**), emphasizing a widespread role for Trib1  
219 in adipose. We considered the possibility that altered hepatic metabolism could explain the  
220 phenotypes observed in Trib1\_ASKO mice, given that the liver is a major regulator of lipoprotein  
221 metabolism and that adipokines such as adiponectin can signal to the liver. However, RNA-seq  
222 of livers from the same mice revealed very few differentially expressed genes, none of which  
223 were major lipid regulators (**Figure 6b, Supplemental Table S1**). Thus, we concluded that  
224 adipocyte Trib1 is regulating plasma lipids through direct regulation by adipose tissue itself.

225 We next ranked differentially expressed genes by signal-to-noise ratio in expression and  
226 performed gene set enrichment analysis (GSEA) (**Figure 6c**). Notably, GSEA highlighted a  
227 striking enrichment of mitochondrial genes among upregulated genes, including genes coding  
228 for proteins in the electron transport chain, mitochondrial ribosomes, and the mitochondrial  
229 membrane, suggesting a potential role for mitochondria in the phenotypes we observed.  
230 Furthermore, multiple gene sets involved in lipid metabolism were upregulated, pointing towards  
231 a role for adipocyte-specific *Trib1* in regulation of lipids through lipid breakdown and metabolism  
232 (**Supplemental Table S2**).

233

234 ***Lipoprotein lipase activity is increased in Trib1\_ASKO adipose***

235           Given the importance of adipocytes in TG storage, we next sought to identify the  
236 physiological mechanism whereby adipocyte-specific *Trib1* regulates plasma TGs. One  
237 mechanism through which adipose contributes to plasma TGs is through the lipolysis of TGs in  
238 the lipid droplet and their release as free fatty acids into the bloodstream; subsequently, free  
239 fatty acids can be repackaged as TGs and secreted by the liver in the form of VLDL [20]. To  
240 assess for an effect on lipolysis by deletion of *Trib1* in adipose, we first measured plasma  
241 nonesterified free fatty acids (NEFA) and glycerol, markers of lipolysis, after stimulating lipolysis  
242 by fasting mice overnight for 16hr. We found that NEFA and glycerol levels were comparable  
243 between *Trib1*\_ASKO and *Trib1*\_fl/fl mice after prolonged fasting (**Supplemental Figure 5a,b**),  
244 suggesting that loss of adipocyte *Trib1* does not impact lipolysis rates under stimulation. We  
245 also assessed the activation of hormone sensitive lipase (HSL), a key lipolytic driver in adipose  
246 that is activated by phosphorylation of key residues, and were unable to detect a difference  
247 between phospho-HSL in subcutaneous adipose from *Trib1*\_ASKO and *Trib1*\_fl/fl mice  
248 (**Supplemental Figure 5c,d**). Consistent with these observations, VLDL secretion also was  
249 unchanged (**Supplemental Figure 5e**), suggesting that the adipose is not providing significantly  
250 different loads of fatty acids to the liver.

251           Given the observed changes in plasma adipokine secretion and the importance of  
252 adipose endocrine functions, we next performed an unbiased secretomics experiment to identify  
253 differentially secreted proteins from *Trib1*\_ASKO adipose. We incubated scWAT explant tissue  
254 from *Trib1*\_fl/fl and *Trib1*\_ASKO mice for 6 hours in serum-free media, and then identified and  
255 quantified proteins in the conditioned media via data independent acquisition (DIA)  
256 (**Supplemental Table S3**). Consistent with our earlier findings of increased adiponectin and  
257 resistin (**Figure 2a,c**), an increase in adiponectin (>50%) and resistin was found in the  
258 conditioned media from the ASKO tissue (**Figure 7a**), thus validating our secretomics data.  
259 Interestingly, we observed significantly decreased *Angptl4* secretion and a trend towards  
260 increased Lipoprotein lipase (Lpl) secretion from *Trib1*\_ASKO scWAT explants (**Figure 7a**).

261 *Angptl4* is an inhibitor of *Lpl*, which binds to the endothelium in vasculature and hydrolyzes TGs  
262 in circulating lipoproteins to free fatty acids, allowing for their uptake and clearance into tissues,  
263 including adipose [21, 22]. In addition to changes in secretion, *Lpl* expression was increased  
264 and *Angptl4* expression was decreased significantly in our RNA-seq dataset. The expression of  
265 *Lmf1*, which codes for Lipase maturation factor and is important for the proper folding and  
266 secretion of *Lpl* [23], was also notably increased in ASKO adipocytes (**Figure 7b**). Overall,  
267 these suggest increased *Lpl* activity in ASKO adipose tissue. We next measured *Lpl* activity in  
268 adipose tissue extracts from *Trib1<sup>fl/fl</sup>* and *Trib1<sup>ASKO</sup>* mice via cleavage of a fluorescent lipid  
269 substrate and found that adipose tissue extracts from both scWAT and VAT from *Trib1<sup>ASKO</sup>*  
270 mice demonstrated increased lipase activity (**Figure 7c,d**), likely contributing to increased TG  
271 clearance in *Trib1<sup>ASKO</sup>* mice.

272

### 273 **Discussion:**

274 Genome-wide association studies have identified SNPs near the *TRIB1* gene that  
275 significantly associate with plasma lipids and CAD, and previous work in liver-specific and  
276 macrophage-specific mouse models have shown important roles for *Trib1* in plasma lipid  
277 regulation as well as in hepatic lipogenesis [7]. An additional GWAS showing an association  
278 between the SNPs and circulating adiponectin levels [11] suggested a potential role for  
279 adipocyte-specific *TRIB1* in lipid metabolism, and we report here that adipocyte-specific *Trib1*  
280 knockout mice have increased plasma adiponectin as well as decreased plasma cholesterol and  
281 TGs, thus validating novel roles for adipocyte-specific *Trib1* in both plasma adiponectin and lipid  
282 regulation. Interestingly, the reduction in plasma TGs and cholesterol in *Trib1<sup>ASKO</sup>* mice is the  
283 opposite of the previously reported liver-specific knock out mice [7], which exhibited increased  
284 plasma TC and TG. This suggests tissue-specific roles for *TRIB1* in regulating plasma lipid  
285 metabolism, and also highlights the difficulty in determining the causal tissue for associations  
286 found in GWAS. Given that there is currently no known functional link between the 8q24 GWAS

287 SNPs and *TRIB1* expression or function [24], further functional genomic studies will be required  
288 to understand if and how these SNPs contribute to tissue-specific TRIB1 function.

289         TRIB1 is one of three mammalian homologs of the Tribbles pseudokinase that was first  
290 discovered in *Drosophila* [17]. These proteins bear homology to serine/threonine kinases, but  
291 lack key catalytic residues that render them unable to catalyze phosphorylation. Instead, they  
292 are best understood to function as scaffolding proteins that bring other proteins into proximity  
293 with each other to mediate signaling events [17]. One of the best understood molecular  
294 functions for TRIB1 is its role in mediating the ubiquitination and degradation of the transcription  
295 factor C/EBP $\alpha$  by bringing it into proximity of the COP1 E3 ubiquitin ligase. Tribbles-mediated  
296 regulation of C/EBP $\alpha$  protein levels has been shown to be an important function in several  
297 models, including as a causal mechanism for the hepatic lipogenesis phenotype in LSKO mice  
298 [7], for myeloid cell proliferation in the context of leukemia [18], and in oogenesis in *drosophila*  
299 [25]. We report here that Trib1\_ASKO adipocytes also exhibit increased C/EBP $\alpha$  protein levels  
300 in the absence of any change in gene expression, and that C/EBP $\alpha$  protein levels are  
301 normalized between control and Trib1\_ASKO SVF-derived adipocytes under conditions of  
302 proteasomal inhibition. Thus, we provide evidence that adipocyte Trib1 also regulates C/EBP $\alpha$   
303 through proteasomal degradation.

304         C/EBP $\alpha$  is a critical regulator of adipocyte differentiation [26]. However, despite  
305 increased C/EBP $\alpha$  protein, we interestingly did not observe any differences in adiposity or  
306 adipose morphology in Trib1\_ASKO mice, or in the *in vitro* differentiation of adipose stem cells  
307 from the ASKO mice. This could be a result of the *Adipoq* promoter-driven Cre, which is induced  
308 late in the process of adipocyte differentiation, thus making our mouse model a post-  
309 differentiation knockout of adipocyte Trib1. A previous report showed that Trib1 overexpression  
310 can inhibit differentiation of 3T3-L1 cells [27], providing precedent for a role for Trib1 in  
311 adipogenesis. Further studies utilizing a different Cre transgene would be required to determine  
312 if Trib1 has a similar role in regulating adipogenesis *in vivo*.

313 We also found that Trib1\_ASKO adipocytes have both increased cellular levels of  
314 adiponectin and increased secretion of adiponectin, with the former likely driving the latter. We  
315 observed no change in *Adipoq* gene expression via repeated qPCR measurements in multiple  
316 *ex vivo* cell culture experiments, whole adipose tissue, and isolated adipocytes from  
317 Trib1\_ASKO mice. Thus, the increase in adiponectin protein comes in the absence of any  
318 reliable change in *Adipoq* gene expression, suggesting a post-transcriptional mechanism of  
319 regulation. We will note, however, that *Adipoq* expression was surprisingly increased in  
320 Trib1\_ASKO mice in our RNA-seq dataset ( $p_{adj} = 0.011$ , fold change = 1.33). This raises the  
321 possibility that increased protein levels of C/EBP $\alpha$ , which is a well-known transcriptional  
322 regulator of adiponectin expression [19], or a different unknown transcription factor is driving a  
323 small increase in *Adipoq* gene expression that qPCR is not sensitive enough to reliably  
324 measure. We note though that while MG132 treatment of SVF-derived adipocytes increases  
325 C/EBP $\alpha$  protein levels, it actually decreases the secretion of adiponectin in wild-type SVF-  
326 derived adipocytes (**Figure 5d**). Thus, while Trib1 certainly appears to regulate C/EBP $\alpha$  in  
327 adipose, we propose this is a separate mechanism from the one governing Trib1 regulation of  
328 adiponectin. The exact nature of the relationship between Trib1 and cellular adiponectin levels  
329 remains to be determined.

330 As noted, Trib1\_ASKO mice exhibit decreased plasma TC and TG levels. We  
331 subsequently determined that these mice also have increased adipose Lpl activity, likely driving  
332 increased uptake of plasma TGs into adipocytes and contributing to the reduction in plasma TG.  
333 This might be expected to drive an increase in adipocyte size, which we did not observe in  
334 Trib1\_ASKO mice. However, GSEA of our RNA-seq data revealed upregulation of genes  
335 encoding mitochondrial components, suggestive of increased mitochondrial activity. A resulting  
336 increase in energy expenditure could potentially explain the lack of an adipocyte size phenotype  
337 in Trib1\_ASKO mice despite increased adipose tissue Lpl activity and presumed fatty acid  
338 uptake. Notably, C/EBP $\alpha$  regulates genes involved in lipid metabolism in adipose tissue and is a

339 known transcriptional regulator of *Lpl* [28, 29], and polymorphisms in C/EBP $\alpha$  have also been  
340 found to associate with plasma TG levels in humans [29]. It is thus possible that increased  
341 C/EBP $\alpha$  protein levels in Trib1\_ASKO adipose may contribute to this lipid phenotype. There is  
342 some precedent that the increased Lpl activity in the Trib1\_ASKO could contribute to the  
343 observed decrease in plasma cholesterol. Multiple studies using transgenic Lpl animal models  
344 [30-32] as well as Angptl4 knockout or transgenic mice [33, 34] demonstrate that increased Lpl  
345 activity protects from diet-induced hypercholesterolemia and decreases plasma LDL-C levels,  
346 though the effects are not as robust as effects on plasma TGs. Mechanistically, lipolysis-  
347 mediated reductions in TGs in VLDL particles have been proposed to facilitate enhanced  
348 clearance of the resulting remnant particles via receptors such as the LDLR [35, 36]. Further  
349 studies are necessary to determine if increased LPL activity is responsible for the cholesterol  
350 phenotype in Trib1\_ASKO mice.

351 Adiponectin has many well-studied roles in regulating cardiometabolic traits, including  
352 lipid metabolism and coronary artery disease [13, 15]. Thus, an important outstanding question  
353 is whether adiponectin is driving the lipid phenotypes observed in the Trib1\_ASKO mice.  
354 Adiponectin's role in insulin sensitization is perhaps its most widely recognized physiological  
355 effect [37, 38], and indeed we found that Trib1\_ASKO mice demonstrated improved glucose  
356 tolerance compared to Trib1 $_{fl/fl}$  mice when placed on high-fat diet. However, a role for  
357 adiponectin in regulating plasma cholesterol is less clear. One previous report using adiponectin  
358 transgenic mice with 10-fold increased adiponectin levels found decreased cholesterol in those  
359 mice [39]. In humans, numerous epidemiological studies have been conducted looking at  
360 associations between adiponectin and plasma LDL-cholesterol, yet many of these are  
361 conflicting or inconclusive [13]. Epidemiological studies and genetic mouse models do provide  
362 clear support for a role for adiponectin in TG and VLDL metabolism. In particular, plasma  
363 adiponectin correlates with decreased plasma TGs and increased HDL-C in humans [40], and  
364 adiponectin transgenic mice with 3-fold increased plasma adiponectin levels have increased Lpl

365 expression and activity in adipose tissue as well as increased TG clearance [41]. Thus, although  
366 the adiponectin phenotype in Trib1\_ASKO mice is mild (~20-30% increase) compared to  
367 transgenic mouse models, it is possible that the increased adipose tissue Lpl activity we  
368 observe in Trib1\_ASKO mice is secondary to increased adiponectin levels. Further studies will  
369 be necessary to determine if the adiponectin phenotype is required for the observed changes in  
370 Trib1\_ASKO plasma lipids.

371 Overall, our studies show that adipocyte-specific *Trib1* is a negative regulator of  
372 adiponectin secretion, and that this appears to be through a C/EBP $\alpha$ -independent mechanism.  
373 Furthermore, we show that adipocyte-specific *Trib1* regulates plasma lipids in a direction  
374 opposite to that of the previously studied LSKO model, and that regulation of TG clearance via  
375 adipose Lpl in part explains the decreased plasma TG levels in ASKO mice. In contrast to  
376 hepatic Trib1, these data suggest a therapeutically beneficial effect of reduced adipocyte *Trib1*  
377 activity, underscoring the continued importance of further studies on *Trib1* and the 8q24 lipid  
378 and CAD GWAS locus.

379

380

## 381 **Methods:**

### 382 *Animals*

383 The previously reported Trib1<sub>fl/fl</sub> mice (Bauer et al, JCI 2015) were bred in house.  
384 *Adipoq*-Cre mice (stock#010803) and Ldlr KO mice (stock#002207) were obtained from  
385 Jackson Labs. Mice were fed ad-libitum on chow diet unless otherwise noted. All experiments  
386 were performed when mice were 8-12 weeks old. Mice were fasted for 4 hr prior to collecting  
387 plasma samples, unless stated otherwise. Blood was collected retro-orbitally and spun at  
388 10,000 rpm for 7 min. Fasting cholesterol and TGs were measured via plate assay using Infinity  
389 reagents (Fisher TR13421 and TR22421), and adipokine levels were measured via ELISA  
390 (adiponectin: Millipore EZ-MADPK, leptin: Millipore EZML-82K, resistin: R&D MRSN00). For

391 HFD experiments, mice were placed on 45% kcal HFD (Research Diets D12451) starting at 8-  
392 12 weeks of age. Plasma was collected retro-orbitally at 0, 4, 8, and 12 weeks of HFD, and  
393 glucose tolerance testing performed at 0, 6, and 12 weeks of HFD as previously described [42].  
394 For fasting/refeeding experiments, mice were fasted overnight for 16 hr and then fed ad-libitum  
395 with chow diet for 3hr. To measure *in vivo* TG secretion, plasma triglycerides were measured in  
396 4 hr-fasted mice 30, 60, 120, and 180 min after i.p. injection of 1mg pluronic (P407) per gram  
397 mouse body weight. All *in vivo* studies described here were approved by Columbia University's  
398 Institutional Animal Care and Use Committee prior to commencement.

399

#### 400 *FPLC analysis of pooled plasma*

401 200  $\mu$ l of pooled plasma from gender and genotype matched mice (n = 4-9) was loaded  
402 onto a Superose 6 column (GE Healthcare) calibrated with elution buffer (0.15 M NaCl, 1 mM  
403 EDTA). The lipoproteins were eluted in a total of 20 mL elution buffer in 0.5 mL fractions at a  
404 rate of 0.3 mL/min. The cholesterol and TG content of each fraction was determined by plate  
405 assay.

406

#### 407 *Western Blot Analysis*

408 Tissues or cells were lysed and homogenized in RIPA buffer supplemented with 1x Halt  
409 Protease and Phosphatase inhibitor (Fisher Scientific PI78444). The lysate was centrifuged at  
410 12,000 xg for 15 min at 4 oC to clarify the protein prep from cellular debris and lipids. ~30 ug  
411 protein was loaded onto 10% bis-tris SDS-PAGE gel and transferred onto a nitrocellulose  
412 membrane. The membrane was blocked in either 5% milk or BSA (for phospho-protein analysis)  
413 and incubated in the appropriate primary antibody (adiponectin (R&D AF1119), Trib1 (Millipore  
414 09-126), Flag (Sigma F7425), Tubulin (CST 3873S), C/EBP $\alpha$  (CST 2295S), Beta-actin (Santa  
415 Cruz sc-81178), Hsl, pHsl565, pHsl563, and pHsl660 (CST 8334T)) overnight. Protein was  
416 detected using a secondary HRP-linked antibody and Luminata Classico Western HRP



417 Substrate (Millipore WBLUC0020). To reprobe membranes, membranes were incubated in  
418 stripping buffer (Fisher Scientific PI21059) for 15 min before reblocking.

419

#### 420 *qPCR analysis*

421 RNA from tissues and cells were isolated using the RNeasy Mini kit (Qiagen). cDNA was  
422 synthesized using the High-Capacity cDNA Reverse Transcription Kit (Applied Biosystems).  
423 qPCR was performed using predesigned Taqman probes from Thermo Fisher Scientific. Gene  
424 expression data was normalized to *Gapdh* and presented as fold change relative to the  
425 Trib1<sub>fl/fl</sub> control group (exceptions indicated in the figure legend).

426

#### 427 *Microscopy*

428 For adipose tissue histology, scWAT samples (<4 mm thick) from Trib1<sub>fl/fl</sub> and  
429 Trib1<sub>ASKO</sub> mice were fixed in 4% PFA for 24 hr. The tissues were then embedded in paraffin,  
430 sectioned at 7 µm, and H&E stained. For each mouse, 4 sections at 70 µm intervals were  
431 imaged on a Nikon Eclipse Ti microscope with the 40x objective and analyzed using the  
432 Adiposoft ImageJ plugin (parameters: minimum diameter = 10 µm, maximum diameter = 100  
433 µm). For Oil Red O staining, cells were fixed in 4% PFA for 15 min and then placed in 0.3% w/v  
434 Oil Red O in 60% isopropanol for 30 min. The cells were washed 5X in distilled H<sub>2</sub>O, and then  
435 imaged with the 20x objective.

436

#### 437 *RNA-seq of adipocytes and hepatocytes*

438 8–12-week-old male mice were euthanized and perfused with PBS after a 4 hr fast.  
439 Subcutaneous inguinal fat pads from individual mice were harvested, minced, and then placed  
440 in 6 mL digestion media (0.14 U/mL Liberase TM, 50 U/mL DNase I, 20 mg/mL BSA in DMEM)  
441 for 1 hr at 37 °C, shaking at 250 rpm. The tissue prep was then filtered through a 100 µm cell  
442 strainer, and spun at 300 xg for 10 min. The floating white layer was collected as the adipocyte

443 fraction and placed in 1mL Qiazol. RNA was then isolated using the RNeasy Lipid Tissue Mini  
444 Kit (Qiagen). Livers from the same mice were harvested and homogenized in Trizol, and RNA  
445 was isolated via chloroform extraction. RNA quality was assessed via BioAnalyzer before being  
446 submitted to the core for bulk, paired-end RNA-sequencing (NextSeq 500). Reads were aligned  
447 using STAR and featurecounts, and differential expression analysis was performed using the  
448 DESeq2 package. Differentially expressed genes ( $p_{adj} < 0.050$ ) were ranked by Signal-to-noise  
449 ratio of median normalized counts and analyzed by GSEA using the Gene Ontology gene sets  
450 ([c5.go.v7.2.symbols.gmt](https://c5.go.v7.2.symbols.gmt)) from MSigDB, using gene set size  $\leq 200$  and 1000 permutations of  
451 the gene sets to determine enrichment score. Cytoscape enrichment plots were constructed  
452 from GSEA results using  $FDR < 0.01$ , and a combined coefficient  $> 0.375$  with combined  
453 constant 0.5 as described in [43]. Nodes were clustered using the MCL clustering algorithm in  
454 the Autoannotate Cytoscape App. Annotations of clusters were manually curated.

455

#### 456 *SVF Generation and Differentiation*

457 Subcutaneous inguinal fat pads from 3-5 mice of the same gender and genotype were  
458 combined and minced in digestion buffer (L-15 Leibovitz media, 1.5% BSA, 1% Pen/Strep, 10  
459 U/mL DNaseI, 480 U/mL Hyaluronidase, 0.14 U/mL Liberase TM). Tissue was allowed to  
460 dissociate in digestion buffer for 1 hr at 37 oC, shaking at 250 rpm. The tissue prep was then  
461 filtered through a 100  $\mu$ M cell strainer and spun at 300 xg, 4oC, for 10 min. The pellet was  
462 saved and resuspended in 10 mL culture medium (DMEM, 10% FBS, 1% Pen/Strep, 2 mM L-  
463 Glut). The cells were spun at 300 xg, 4 oC, for 10 min, and resuspended in 5 mL culture  
464 medium supplemented with 1  $\mu$ g/mL insulin before seeding. Media was changed every 2 – 3  
465 days until the cells were >95% confluent. Differentiation was initiated with a cocktail including  
466 10% FBS, 1% Pen/Strep, 5  $\mu$ g/mL insulin, 1  $\mu$ M Rosiglitazone, 1  $\mu$ M Dexamethasone, and 250  
467  $\mu$ M IBMX in DMEM/F12. After 48 hr, cells were maintained in DMEM/F12 supplemented with

468 only 10% FBS, 1% Pen/Strep, 5 µg/mL insulin, and 1 µM Rosiglitazone. Experiments were  
469 started after day 7 of differentiation.

470

#### 471 *Global quantitative proteomics of Explant secretomics*

472 Mice were euthanized and perfused with PBS before dissection of subcutaneous  
473 adipose fat pads. 50 mg of tissue was placed into 1mL of warm, serum-free DMEM in a 12 well  
474 plate and pinned down with transwell insert. The media was collected after 6hr and protein was  
475 precipitated using methanol. DIA (Data independent acquisition) based proteomics was used. In  
476 brief, protein precipitated pellets were resuspended in SDC lysis buffer [44] ( 1% SDC, 10 mM  
477 TCEP, 40 mM CAA and 100 mM Tris-HCl pH 8.5) and boiled for 10 min at 95°C, 1500 rpm to  
478 denature and reduce and alkylate cysteins, followed by sonication in a water bath, cooled down  
479 to room temperature. Protein concentration was estimated by BCA measurement and 20 µg  
480 were further processed for overnight digestion by adding LysC and trypsin in a 1:50 ratio (µg of  
481 enzyme to µg of protein) at 37° C and 1500 rpm. Peptides were acidified by adding 1% TFA,  
482 vortexed, and subjected to StageTip clean-up via SDB-RPS. 20 µg of peptides were loaded on  
483 two 14-gauge StageTip plugs. Peptides were washed two times with 200 µL 1% TFA 99% ethyl  
484 acetate followed 200 µL 0.2% TFA/5%ACN in centrifuge at 3000 rpm, followed by elution with  
485 60 µL of 1% Ammonia, 50% ACN into eppendorf tubes and dried at 60°C in a SpeedVac  
486 centrifuge. Peptides were resuspended in 10 µL of 3% acetonitrile/0.1% formic acid and injected  
487 on Thermo Scientific™ Orbitrap Fusion™ Tribrid™ mass spectrometer with DIA method [45] for  
488 peptide MS/MS analysis. The UltiMate 3000 UHPLC system (Thermo Scientific) and EASY-  
489 Spray PepMap RSLC C18 50 cm x 75 µm ID column (Thermo Fisher Scientific) coupled with  
490 Orbitrap Fusion (Thermo) were used to separate fractioned peptides with a 5-30% acetonitrile  
491 gradient in 0.1% formic acid over 127 min at a flow rate of 250 nL/min. After each gradient, the  
492 column was washed with 90% buffer B for 5 min and re-equilibrated with 98% buffer A (0.1%  
493 formic acid, 100% HPLC-grade water) for 40min. Survey scans of peptide precursors were

494 performed from 350-1200  $m/z$  at 120K FWHM resolution (at 200  $m/z$ ) with a  $1 \times 10^6$  ion count  
495 target and a maximum injection time of 60 ms. The instrument was set to run in top speed mode  
496 with 3 s cycles for the survey and the MS/MS scans. After a survey scan, 26  $m/z$  DIA segments  
497 will be acquired at from 200-2000  $m/z$  at 60K FWHM resolution (at 200  $m/z$ ) with a  $1 \times 10^6$  ion  
498 count target and a maximum injection time of 118 ms. HCD fragmentation was applied with 27%  
499 collision energy and resulting fragments were detected using the rapid scan rate in the Orbitrap.  
500 The spectra were recorded in profile mode. DIA data were analyzed with directDIA 2.0 (Deep  
501 learning augmented spectrum-centric DIA analysis) in Spectronaut Pulsar X, a mass  
502 spectrometer vendor independent software from Biognosys. The default settings were used for  
503 targeted analysis of DIA data in Spectronaut except the decoy generation was set to “mutated”.  
504 The false discovery rate (FDR) will be estimated with the mProphet approach and set to 1% at  
505 peptide precursor level and at 1% at protein level.

506 Results obtained from Spectronaut were further analyzed using the Spectronaut  
507 statistical package. Significantly changed protein abundance was determined by un-paired t-test  
508 with a threshold for significance of  $p < 0.05$  (permutation-based FDR correction) and 0.58  
509  $\log_2FC$ .

510

511

## 512 *Cloning and Lentivirus Production*

513 Lentiviral constructs for tetracycline-inducible expression of proteins (mTrib1 and eGFP)  
514 in adipocytes for overexpression experiments were cloned by first introducing a 3xFlagHA tag at  
515 the C-terminal end of each protein. The fusion proteins were then cloned into the pEN-TTMCS  
516 entry vector to introduce a tight TRE promoter and subsequently cloned into the pSLIK-neo  
517 lentiviral plasmid via Gateway cloning. mTrib1 and eGFP were also cloned into the  
518 pLentiCMVPuroDEST lentiviral vector for constitutive overexpression under the CMV promoter.

519 To produce the virus,  $5 \times 10^6$  293T cells were seeded in T75 flasks and transfected with  
520 2  $\mu\text{g}$  MD2G, 3  $\mu\text{g}$  Pax2, and 5  $\mu\text{g}$  lentiviral construct with 30  $\mu\text{L}$  Fugene 6 (Promega) the  
521 following day. The media was changed the day after transfection, and the viral supernatant was  
522 collected and pooled after 24hr and 48hr. The supernatant was filtered through a 0.45  $\mu\text{m}$  filter,  
523 aliquoted, and stored at  $-80^\circ\text{C}$  until use.

524

#### 525 *Adipocyte Cell culture*

526 3T3-L1 cells were purchased from ATCC and cultured in DMEM supplemented with 10%  
527 FBS, 1 mM Sodium Pyruvate, and 1% Pen/Strep. Cells were tested for mycoplasma every three  
528 months. To differentiate 3T3-L1 cells to adipocytes, cells were induced with growth media  
529 supplemented with 1  $\mu\text{M}$  Dexamethasone, 0.5 mM IBMX, and 1  $\mu\text{g}/\text{mL}$  Insulin for 48 hr, and  
530 then maintained in growth media supplemented with only 1  $\mu\text{g}/\text{mL}$  insulin. Experiments were  
531 typically performed on cells 7 – 9 days after differentiation induction. Stable doxycycline-  
532 inducible 3T3-L1 cells were generated by transducing cells with lentivirus at an MOI  $\sim 100$ ,  
533 followed by selection with 1.5  $\mu\text{g}/\text{mL}$  puromycin. Conditioned media was collected in OptiMEM I  
534 reduced serum media.

535

#### 536 *Fluorescent LPL Assay*

537 The Lpl activity assay was adapted from Basu et. al [46]. Briefly, adipose tissue was  
538 minced in 5  $\mu\text{l}$  x mg tissue weight volume in tissue incubation buffer (PBS, 2 mg/ml FA-free  
539 BSA, 5 U/mL heparin), incubated for 1 hr in a 37 oC shaker, and centrifuged at 3,000 rpm for 15  
540 min at 4 oC. The clarified supernatant was placed in fresh tubes and diluted 1:10 in tissue  
541 incubation buffer. 4  $\mu\text{l}$  of lysate was placed in duplicate in a black-walled 96-well plate, and 100  
542  $\mu\text{L}$  reaction buffer (0.15 M NaCl, 20 mM Tris-HCl pH 8.0, 0.0125% Zwittergent, 1.5% FA-free  
543 BSA, 0.62  $\mu\text{M}$  EnzChek (Invitrogen E33955)) was added to each well. The reaction was allowed  
544 to incubate 20 min at 37 oC, and was then read at an excitation of 485 and emission of 515. A

545 blank RFU value was subtracted from all experimental RFU values, and the resulting values  
546 were reported.

547

#### 548 *Statistics*

549 GraphPad Prism 8 was used to graph data and to perform parametric 2-tailed Student's t  
550 tests and 1- and 2-way ANOVA analyses with multiple correction using either Dunnett's,  
551 Sidak's, or Tukey's method as indicated in the figure legends.

552

553

554 **Acknowledgements:** These studies were funded by R01HL141745 (R.C.B) from the  
555 NIH/NHLBI and Scientific Development Grant 16SDG31180039 (R.C.B) from the American  
556 Heart Association. Additionally, E.E.H was supported by a Ruth L. Kirschstein Individual  
557 Predoctoral F30 NRSA (F30HL146076-01A1) from the NIH/NHLBI.

558

559 **Author Contributions:** R.C.B conceived the project, designed the experiments, supervised  
560 analyses and edited the manuscript. E.E.H. performed the majority of the experiments and data  
561 analysis, and wrote the first draft of the manuscript and edited subsequent versions. G.I.Q  
562 helped establish the mouse colony, assisted with SVF isolation, and performed related  
563 molecular biology (i.e. cloning, western blots). R.L. performed western blotting for adipose  
564 lipolysis proteins and ELISA analysis. C.X. performed the DESeq2 analysis of the RNA-seq data.  
565 A.H. performed initial FPLC analysis and assisted with all FPLC analysis. R.I. performed SVF  
566 isolation and cloning of viral vectors. J.C. managed the animal colony and assisted with insulin  
567 trait experiments. R.K.S. performed and analyzed the secretomics MS experiment. All the  
568 authors read and approved the manuscript.

569

570 **Competing Interests Statement:** The Authors declare no competing interests.

571

572 **Data Availability Statement:** GEO accession numbers for RNA-seq data will be available prior  
573 to publication. Full list of identified proteins and differentially secreted proteins from DIA  
574 secretomics (Figure 7a) is available in supplemental table S3. Other data that support the  
575 findings of this study are available from the corresponding author upon reasonable request.

576

577 **References:**

578

- 579 1. Willer, C.J., et al., *Newly identified loci that influence lipid concentrations and risk of*  
580 *coronary artery disease*. Nat Genet, 2008. **40**(2): p. 161-9.
- 581 2. Kathiresan, S., et al., *Six new loci associated with blood low-density lipoprotein*  
582 *cholesterol, high-density lipoprotein cholesterol or triglycerides in humans*. Nat Genet,  
583 2008. **40**(2): p. 189-97.
- 584 3. Teslovich, T.M., et al., *Biological, clinical and population relevance of 95 loci for blood*  
585 *lipids*. Nature, 2010. **466**(7307): p. 707-13.
- 586 4. Consortium, I.K.C., *Large-scale gene-centric analysis identifies novel variants for*  
587 *coronary artery disease*. PLoS Genet, 2011. **7**(9): p. e1002260.
- 588 5. Consortium, C.A.D., et al., *Large-scale association analysis identifies new risk loci for*  
589 *coronary artery disease*. Nat Genet, 2013. **45**(1): p. 25-33.
- 590 6. Willer, C.J., et al., *Discovery and refinement of loci associated with lipid levels*. Nat  
591 Genet, 2013. **45**(11): p. 1274-1283.
- 592 7. Bauer, R.C., et al., *Tribbles-1 regulates hepatic lipogenesis through posttranscriptional*  
593 *regulation of C/EBPalpha*. J Clin Invest, 2015. **125**(10): p. 3809-18.
- 594 8. Burkhardt, R., et al., *Trib1 is a lipid- and myocardial infarction-associated gene that*  
595 *regulates hepatic lipogenesis and VLDL production in mice*. J Clin Invest, 2010. **120**(12):  
596 p. 4410-4.

- 597 9. Johnston, J.M., et al., *Myeloid Tribbles 1 induces early atherosclerosis via enhanced*  
598 *foam cell expansion*. Sci Adv, 2019. **5**(10): p. eaax9183.
- 599 10. Chambers, J.C., et al., *Genome-wide association study identifies loci influencing*  
600 *concentrations of liver enzymes in plasma*. Nat Genet, 2011. **43**(11): p. 1131-8.
- 601 11. Dastani, Z., et al., *Novel loci for adiponectin levels and their influence on type 2 diabetes*  
602 *and metabolic traits: a multi-ethnic meta-analysis of 45,891 individuals*. PLoS Genet,  
603 2012. **8**(3): p. e1002607.
- 604 12. Lihn, A.S., S.B. Pedersen, and B. Richelsen, *Adiponectin: action, regulation and*  
605 *association to insulin sensitivity*. Obes Rev, 2005. **6**(1): p. 13-21.
- 606 13. Izadi, V., E. Farabad, and L. Azadbakht, *Epidemiologic evidence on serum adiponectin*  
607 *level and lipid profile*. Int J Prev Med, 2013. **4**(2): p. 133-40.
- 608 14. Xu, A., et al., *The fat-derived hormone adiponectin alleviates alcoholic and nonalcoholic*  
609 *fatty liver diseases in mice*. J Clin Invest, 2003. **112**(1): p. 91-100.
- 610 15. Pischon, T., et al., *Plasma adiponectin levels and risk of myocardial infarction in men*.  
611 JAMA, 2004. **291**(14): p. 1730-7.
- 612 16. Ostertag, A., et al., *Control of adipose tissue inflammation through TRB1*. Diabetes,  
613 2010. **59**(8): p. 1991-2000.
- 614 17. Evers, P.A., K. Keeshan, and N. Kannan, *Tribbles in the 21st Century: The Evolving*  
615 *Roles of Tribbles Pseudokinases in Biology and Disease*. Trends Cell Biol, 2017. **27**(4):  
616 p. 284-298.
- 617 18. Dedhia, P.H., et al., *Differential ability of Tribbles family members to promote*  
618 *degradation of C/EBPalpha and induce acute myelogenous leukemia*. Blood, 2010.  
619 **116**(8): p. 1321-8.
- 620 19. Christy, R.J., et al., *Differentiation-induced gene expression in 3T3-L1 preadipocytes:*  
621 *CCAAT/enhancer binding protein interacts with and activates the promoters of two*  
622 *adipocyte-specific genes*. Genes Dev, 1989. **3**(9): p. 1323-35.



- 623 20. Duncan, R.E., et al., *Regulation of lipolysis in adipocytes*. Annu Rev Nutr, 2007. **27**: p.  
624 79-101.
- 625 21. Dijk, W. and S. Kersten, *Regulation of lipoprotein lipase by Angptl4*. Trends Endocrinol  
626 Metab, 2014. **25**(3): p. 146-55.
- 627 22. Goldberg, I.J. and M. Merkel, *Lipoprotein lipase: physiology, biochemistry, and*  
628 *molecular biology*. Front Biosci, 2001. **6**: p. D388-405.
- 629 23. Doolittle, M.H., N. Ehrhardt, and M. Peterfy, *Lipase maturation factor 1: structure and*  
630 *role in lipase folding and assembly*. Curr Opin Lipidol, 2010. **21**(3): p. 198-203.
- 631 24. Jadhav, K.S. and R.C. Bauer, *Trouble With Tribbles-1*. Arterioscler Thromb Vasc Biol,  
632 2019. **39**(6): p. 998-1005.
- 633 25. Rorth, P., K. Szabo, and G. Texido, *The level of C/EBP protein is critical for cell*  
634 *migration during Drosophila oogenesis and is tightly controlled by regulated degradation*.  
635 Mol Cell, 2000. **6**(1): p. 23-30.
- 636 26. Farmer, S.R., *Transcriptional control of adipocyte formation*. Cell Metab, 2006. **4**(4): p.  
637 263-73.
- 638 27. Naiki, T., et al., *TRB2, a mouse Tribbles ortholog, suppresses adipocyte differentiation*  
639 *by inhibiting AKT and C/EBPbeta*. J Biol Chem, 2007. **282**(33): p. 24075-82.
- 640 28. Madsen, M.S., et al., *Peroxisome proliferator-activated receptor gamma and*  
641 *C/EBPalpha synergistically activate key metabolic adipocyte genes by assisted loading*.  
642 Mol Cell Biol, 2014. **34**(6): p. 939-54.
- 643 29. Olofsson, L.E., et al., *CCAAT/enhancer binding protein alpha (C/EBPalpha) in adipose*  
644 *tissue regulates genes in lipid and glucose metabolism and a genetic variation in*  
645 *C/EBPalpha is associated with serum levels of triglycerides*. J Clin Endocrinol Metab,  
646 2008. **93**(12): p. 4880-6.

- 647 30. Shimada, M., et al., *Suppression of diet-induced atherosclerosis in low density*  
648 *lipoprotein receptor knockout mice overexpressing lipoprotein lipase*. Proc Natl Acad Sci  
649 U S A, 1996. **93**(14): p. 7242-6.
- 650 31. Fan, J., et al., *Overexpression of lipoprotein lipase in transgenic rabbits inhibits diet-*  
651 *induced hypercholesterolemia and atherosclerosis*. J Biol Chem, 2001. **276**(43): p.  
652 40071-9.
- 653 32. Walton, R.G., et al., *Increasing adipocyte lipoprotein lipase improves glucose*  
654 *metabolism in high fat diet-induced obesity*. J Biol Chem, 2015. **290**(18): p. 11547-56.
- 655 33. Koster, A., et al., *Transgenic angiopoietin-like (angptl)4 overexpression and targeted*  
656 *disruption of angptl4 and angptl3: regulation of triglyceride metabolism*. Endocrinology,  
657 2005. **146**(11): p. 4943-50.
- 658 34. Aryal, B., et al., *Absence of ANGPTL4 in adipose tissue improves glucose tolerance and*  
659 *attenuates atherogenesis*. JCI Insight, 2018. **3**(6).
- 660 35. Aviram, M., E.L. Bierman, and A. Chait, *Modification of low density lipoprotein by*  
661 *lipoprotein lipase or hepatic lipase induces enhanced uptake and cholesterol*  
662 *accumulation in cells*. J Biol Chem, 1988. **263**(30): p. 15416-22.
- 663 36. Sehayek, E., U. Lewin-Velvert, T. Chajek-Shaul, and S. Eisenberg, *Lipolysis exposes*  
664 *unreactive endogenous apolipoprotein E-3 in human and rat plasma very low density*  
665 *lipoprotein*. J Clin Invest, 1991. **88**(2): p. 553-60.
- 666 37. Tilg, H. and A.R. Moschen, *Adipocytokines: mediators linking adipose tissue,*  
667 *inflammation and immunity*. Nat Rev Immunol, 2006. **6**(10): p. 772-83.
- 668 38. Yanai, H. and H. Yoshida, *Beneficial Effects of Adiponectin on Glucose and Lipid*  
669 *Metabolism and Atherosclerotic Progression: Mechanisms and Perspectives*. Int J Mol  
670 Sci, 2019. **20**(5).

- 671 39. Bauche, I.B., et al., *Overexpression of adiponectin targeted to adipose tissue in*  
672 *transgenic mice: impaired adipocyte differentiation*. *Endocrinology*, 2007. **148**(4): p.  
673 1539-49.
- 674 40. Christou, G.A. and D.N. Kiortsis, *Adiponectin and lipoprotein metabolism*. *Obes Rev*,  
675 2013. **14**(12): p. 939-49.
- 676 41. Combs, T.P., et al., *A transgenic mouse with a deletion in the collagenous domain of*  
677 *adiponectin displays elevated circulating adiponectin and improved insulin sensitivity*.  
678 *Endocrinology*, 2004. **145**(1): p. 367-83.
- 679 42. Lagor, W.R., et al., *Deletion of murine Arv1 results in a lean phenotype with increased*  
680 *energy expenditure*. *Nutr Diabetes*, 2015. **5**: p. e181.
- 681 43. Reimand, J., et al., *Pathway enrichment analysis and visualization of omics data using*  
682 *g:Profiler, GSEA, Cytoscape and EnrichmentMap*. *Nat Protoc*, 2019. **14**(2): p. 482-517.
- 683 44. Kulak, N.A., et al., *Minimal, encapsulated proteomic-sample processing applied to copy-*  
684 *number estimation in eukaryotic cells*. *Nat Methods*, 2014. **11**(3): p. 319-24.
- 685 45. Bruderer, R., et al., *Extending the limits of quantitative proteome profiling with data-*  
686 *independent acquisition and application to acetaminophen-treated three-dimensional*  
687 *liver microtissues*. *Mol Cell Proteomics*, 2015. **14**(5): p. 1400-10.
- 688 46. Basu, D., J. Manjur, and W. Jin, *Determination of lipoprotein lipase activity using a novel*  
689 *fluorescent lipase assay*. *J Lipid Res*, 2011. **52**(4): p. 826-32.

690

1 **Figures:**

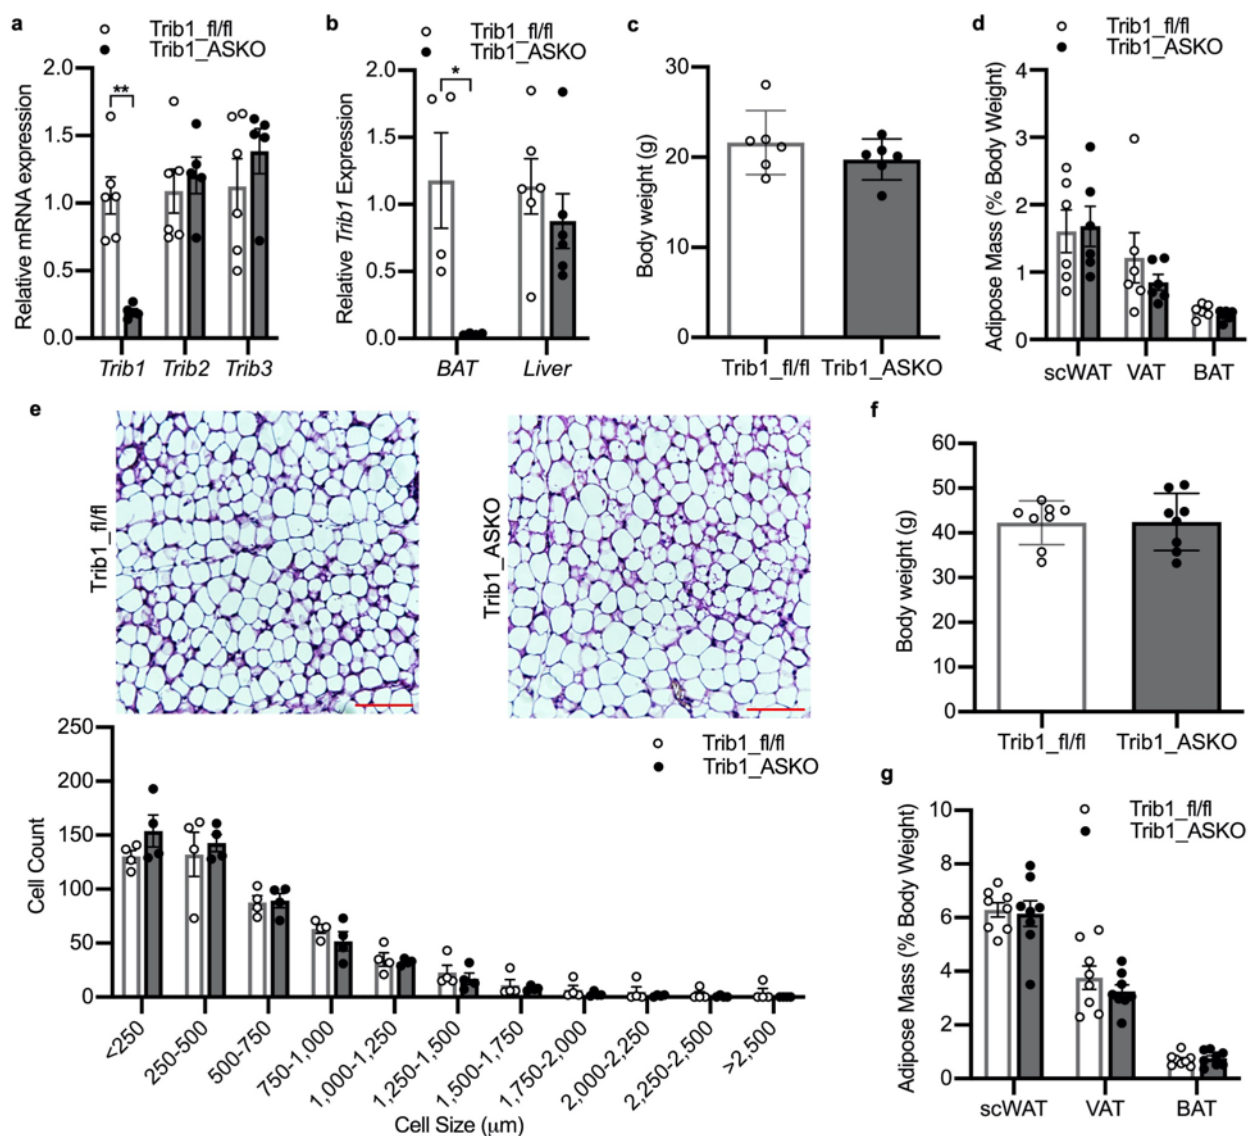

2  
 3 **Figure 1: Adipocyte-specific knockout of Tribbles1 does not result in**  
 4 **adiposity.** **a**, Taqman qPCR for *Trib1*, *Trib2*, and *Trib3* in scWAT from 8–10-week-old *Trib1*<sub>fl/fl</sub>  
 5 and ASKO mice (*n* = 5). **b**, Taqman qPCR for *Trib1* from BAT (*n* = 4) and livers (*n* = 6) of  
 6 *Trib1*<sub>fl/fl</sub> and *Trib1*<sub>ASKO</sub> mice. **c,d**, Body weight (**c**) and adipose depot masses (**d**) in chow-  
 7 fed *Trib1*<sub>fl/fl</sub> and ASKO mice (*n* = 6). **e**, Representative H&E stain of scWAT from *Trib1*<sub>fl/fl</sub>  
 8 and ASKO mice and quantitation of cell size by Adiposoft (*n* = 4 mice). Bar = 100 μm. **f,g**, Body  
 9 weight (**f**) and adipose depot masses (**g**) in 12 week HFD-fed *Trib1*<sub>fl/fl</sub> and ASKO mice (*n* = 8).

10 All gene expression data is depicted as mean  $\pm$  s.e.m. All other data is depicted as mean  $\pm$  s.d.

11 Significance in all panels determined by Student's *t* test (\**p* < 0.05, \*\**p* < 0.01).

12

13

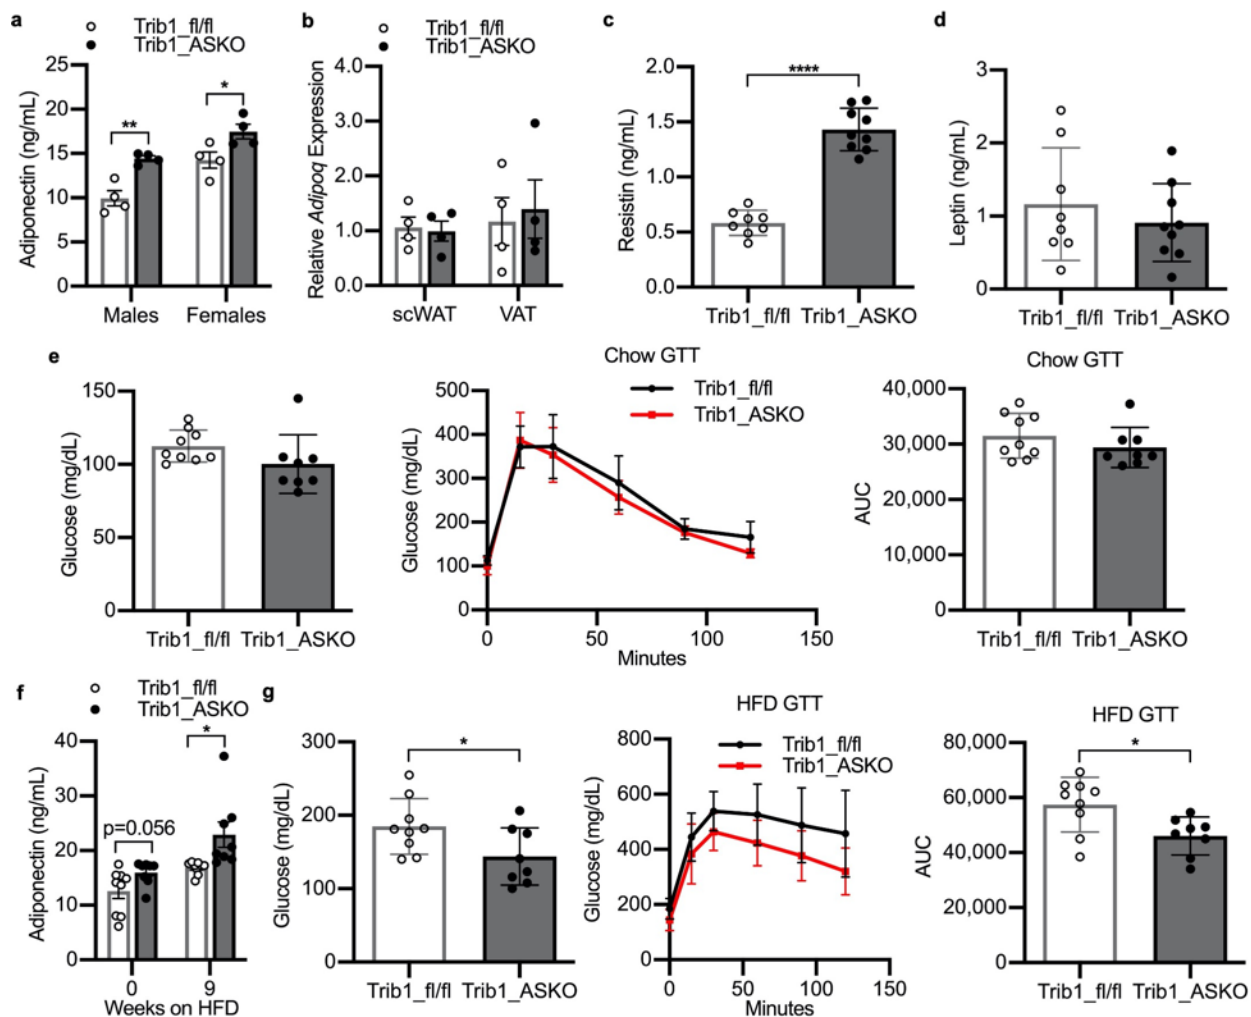

14

15 **Figure 2: Trib1\_ASKO mice have increased plasma adiponectin.** **a**, Plasma adiponectin in

16 4hr-fasted 8-week-old chow-fed Trib1\_fl/fl and Trib1\_ASKO mice (*n* = 4). **b**, Taqman qPCR for

17 *Adipoq* in scWAT and VAT from Trib1\_fl/fl and Trib1\_ASKO mice (*n* = 4). **c,d**, Plasma resistin

18 (**c**) and plasma leptin (**d**) in 4 hr-fasted chow-fed Trib1\_fl/fl and Trib1\_ASKO mice (*n* = 8). **e**,

19 Glycemic traits after 16 hr overnight fast in chow-fed 8–10-week-old male Trib1\_fl/fl and

20 Trib1\_ASKO mice (*n* = 7). **f**, Plasma adiponectin in 4 hr-fasted 9 week HFD-fed Trib1\_fl/fl and

21 Trib1\_ASKO mice ( $n = 8$ ). **g**, Glycemic traits after 16 hr overnight fast in 12 week HFD-fed male  
22 Trib1\_fl/fl and Trib1\_ASKO mice ( $n = 8$ ). Gene expression is depicted as mean  $\pm$  s.e.m. All  
23 other data is depicted as mean  $\pm$  s.d. Significance in all panels determined by Student's *t* test  
24 (\* $p < 0.05$ , \*\* $p < 0.01$ , \*\*\*\* $p < 0.0001$ ).  
25

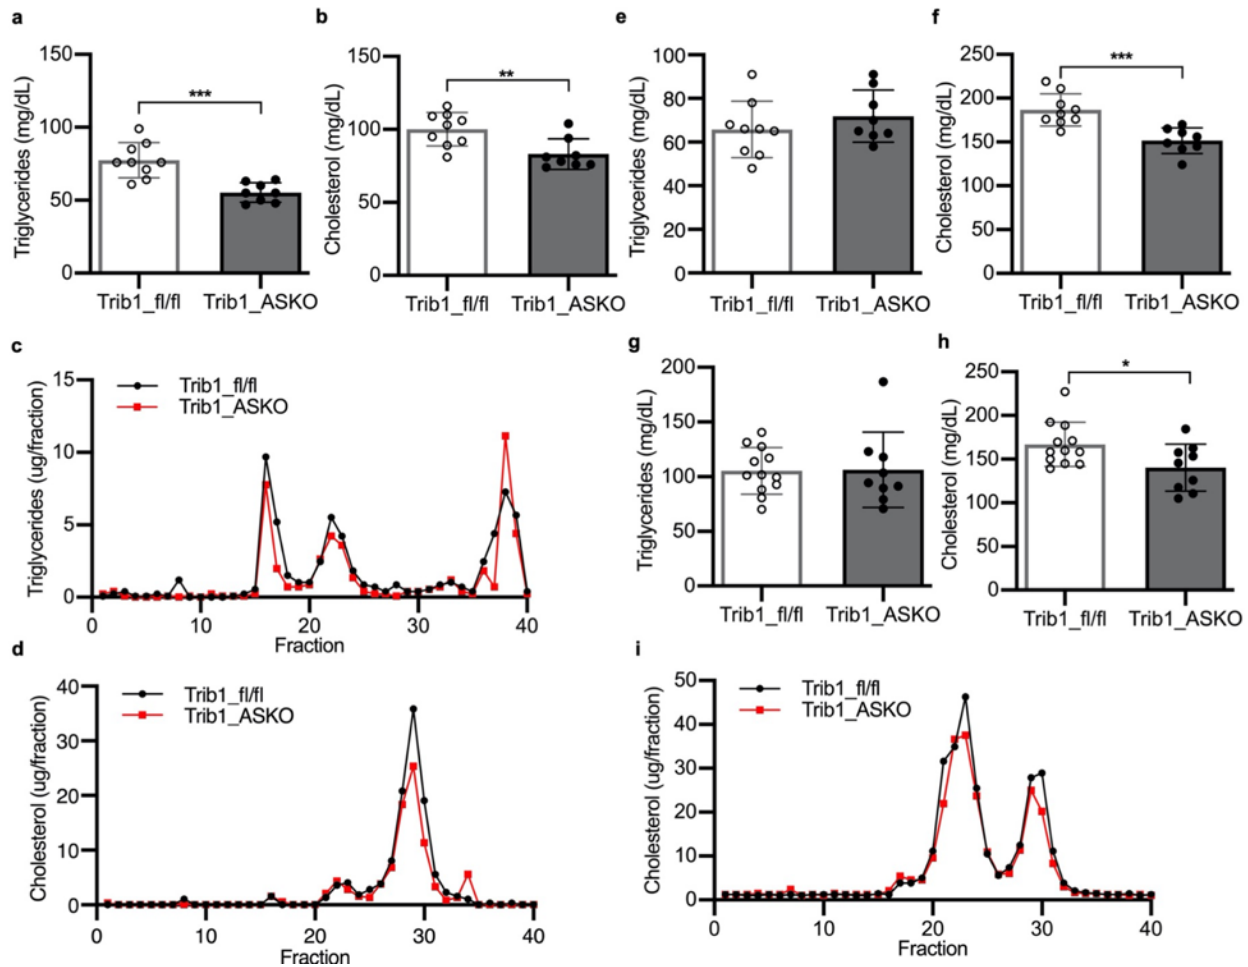

26  
27 **Figure 3: Trib1\_ASKO mice have decreased plasma cholesterol and triglycerides. a,b,**  
28 Plasma triglyceride (**a**) and total cholesterol (**b**) levels in 8–10-week-old, 4 hr-fasted chow-fed  
29 male Trib1\_fl/fl and Trib1\_ASKO mice ( $n = 8$ ). **c,d**, Plasma triglyceride (**c**) and cholesterol (**d**)  
30 FPLC profiles of pooled plasma ( $n = 4$ ) from 4 hr-fasted chow-fed male Trib1\_fl/fl and  
31 Trib1\_ASKO mice. **e,f**, Plasma triglyceride (**e**) and total cholesterol (**f**) levels in 4 hr-fasted 12  
32 week HFD-fed Trib1\_fl/fl and Trib1\_ASKO mice ( $n = 8$ ). **g,h**, Plasma triglyceride(**g**) and total

33 cholesterol (h) levels in 8-week-old, 4 hr-fasted chow-fed male Trib1<sup>fl/fl</sup>; Ldlr KO and  
 34 Trib1<sup>ASKO</sup>; Ldlr KO mice (n = 9). i, Cholesterol FPLC profile of pooled plasma (n = 4) from 4  
 35 hr-fasted chow-fed female Trib1<sup>fl/fl</sup>; Ldlr KO and Trib1<sup>ASKO</sup>; Ldlr KO mice. Data is depicted  
 36 as mean ± s.d. Significance in all panels determined by Student's *t* test (\*p < 0.05, \*\*p < 0.01,  
 37 \*\*\* p < 0.001).  
 38

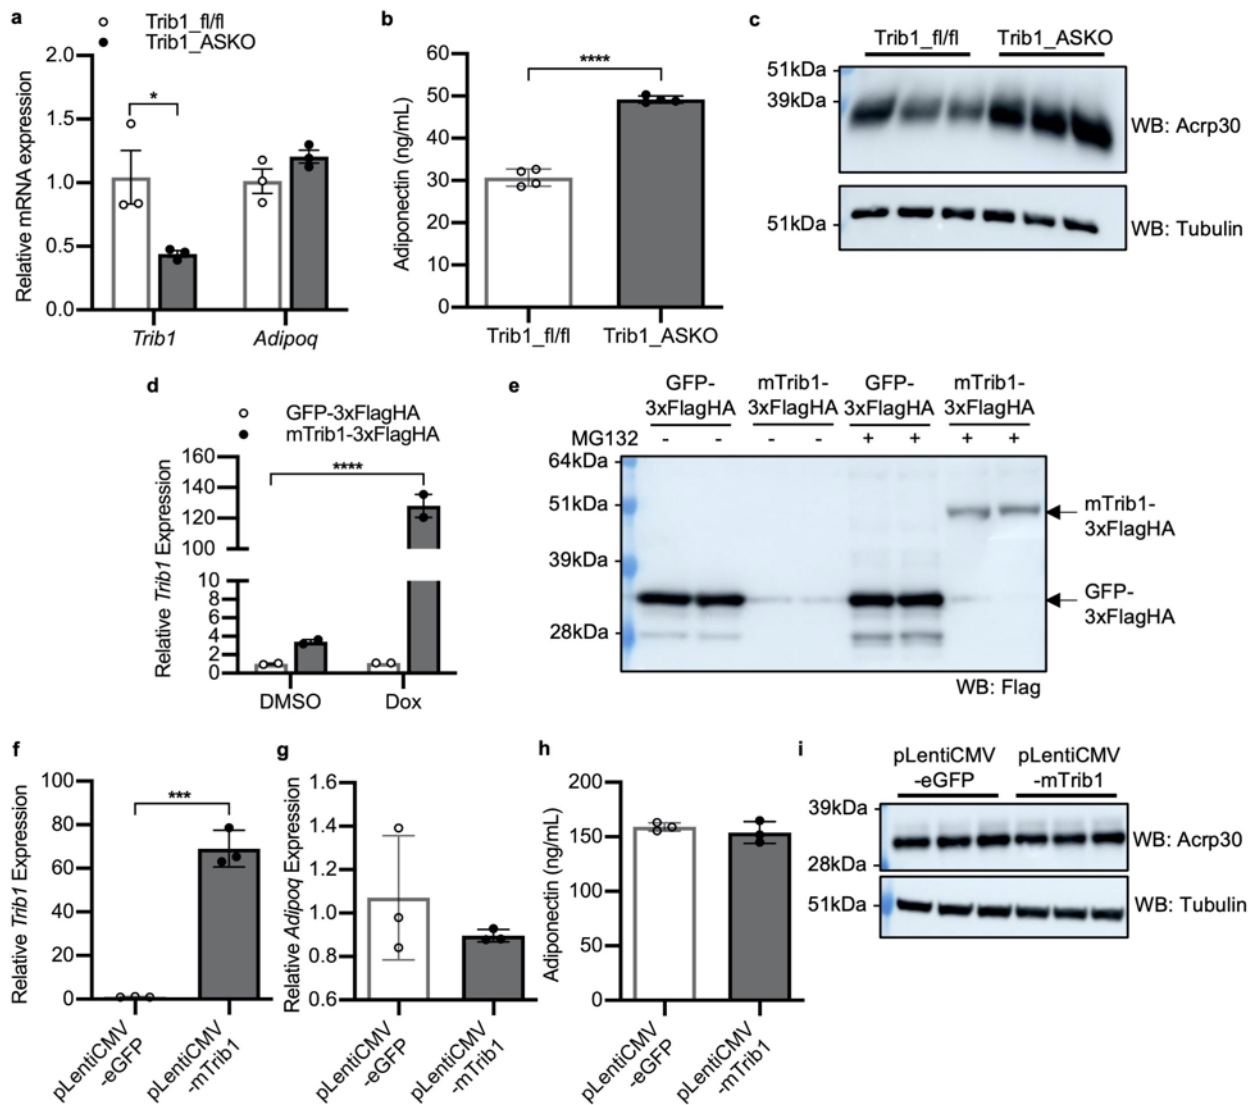

39 **Figure 4: Adipocyte-specific knockout of Tribbles1 results in increased adiponectin**  
 40 **secretion.** **a**, Taqman qPCR for *Trib1* and *Adipoq* in SVF-derived adipocytes (n = 3). **b**,  
 41 **Adiponectin concentration in conditioned media from SVF-derived adipocytes (n = 4).**

43 Conditioned media was generated by culturing SVF-derived adipocytes in OptiMEM reduced-  
44 serum media for 4 hr. **c**, Western blot analysis of adiponectin (Acrp30) and tubulin levels in  
45 SVF-derived adipocytes. **d**, Taqman qPCR for *Trib1* in pSlik-neo-TTMCS\_eGFP-3xFlagHA and  
46 pSlik-neo-TTMCS\_mTrib1-3xFlagHA stable 3T3-L1 cells treated with either DMSO or  
47 doxycycline (1  $\mu$ g/mL) ( $n = 2$ ). Gene expression is expressed relative to the DMSO-treated GFP  
48 stable cells. Significance relative to DMSO treated GFP stable cells was determined by 1-way  
49 ANOVA (Dunnett's multiple comparison test) **e**, Western blot for Flag-tagged protein  
50 overexpression in pSlik-neo-TTMCS\_eGFP-3xFlagHA and pSlik-neo-TTMCS\_mTrib1-3xFlagHA  
51 stable 3T3-L1 preadipocytes induced with 1  $\mu$ g/mL Dox for 48 hr and treated with or without 20  
52  $\mu$ M MG132 for 5 hr. **f-i**, Mature 3T3-L1 adipocytes were transduced with lentivirus to  
53 overexpress eGFP (pLentiCMV-eGFP) or mTrib1 (pLentiCMV-mTrib1) under the CMV  
54 promoter. Taqman qPCR for *Trib1* (**f**) and *Adipoq* (**g**) ( $n = 3$ ). Gene expression is expressed  
55 relative to the pLentiCMV-eGFP group. **h**, ELISA for adiponectin in 4 hr conditioned media ( $n =$   
56 3). **i**, Western blot for adiponectin protein expression. Gene expression is depicted as mean  $\pm$   
57 s.e.m. All other data is depicted as mean  $\pm$  s.d. Significance in all panels determined by  
58 Student's *t* test except where indicated (\* $p < 0.05$ , \*\*\* $p < 0.001$ , \*\*\*\* $p < 0.0001$ ).

59

60

61

62

63

64

65

66

67

68



69

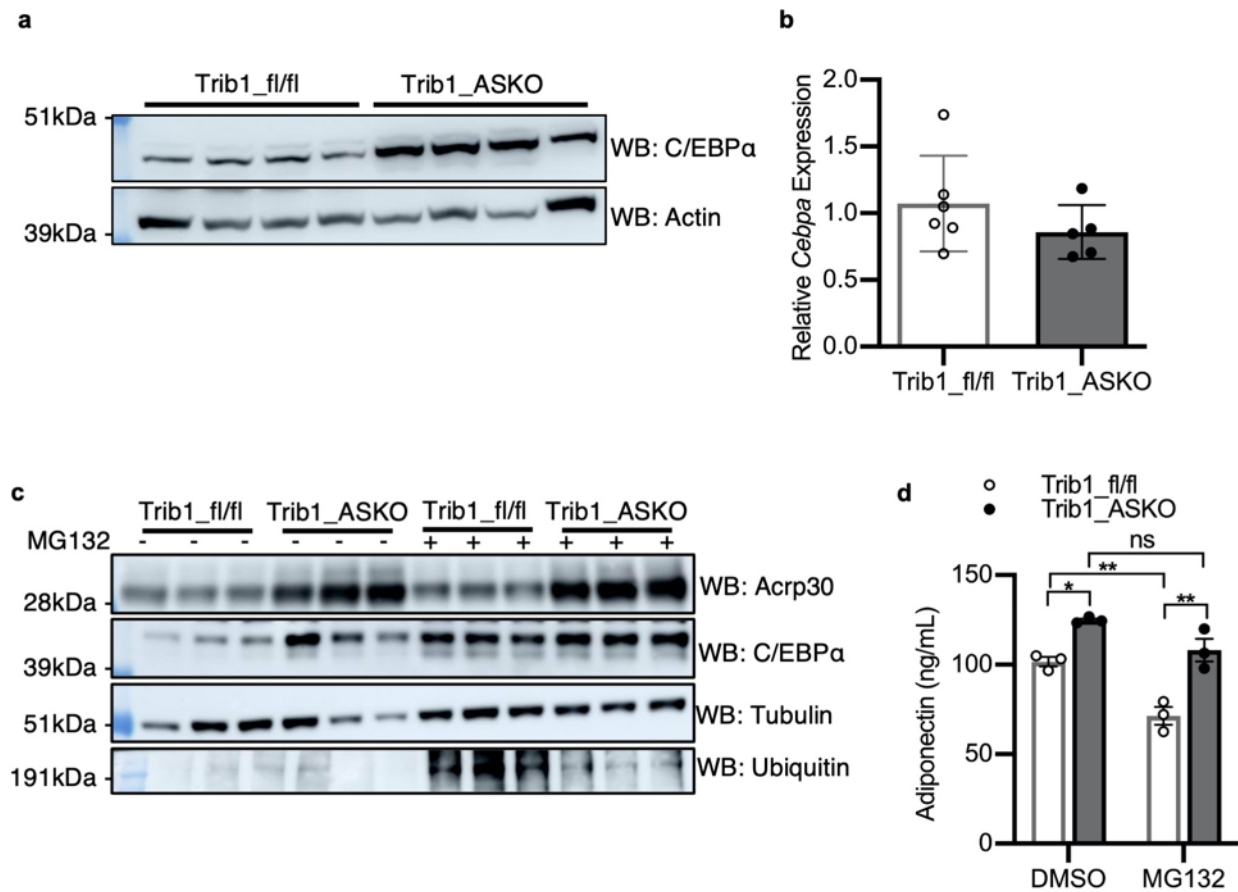

70

71 **Figure 5: Trib1 does not regulate adiponectin through the proteasome in SVF-derived**

72 **adipocytes. a**, Western blot of C/EBPα in scWAT of Trib1\_fl/fl and Trib1\_ASKO mice. **b**, qPCR

73 for *Cebpa* gene expression in scWAT of Trib1\_fl/fl and Trib1\_ASKO mice ( $n = 5$ ). **c,d**, SVF-

74 derived adipocytes from Trib1\_fl/fl and Trib1\_ASKO scWAT were differentiated, pretreated with

75 30 μM MG132 for 1hr, and then treated with 30 μM MG132 for an additional 4 hr before

76 measuring protein expression and adiponectin secretion. **c**, Western blot for adiponectin

77 (Acrp30) and C/EBPα protein in 5 hr MG132 treated Trib1\_fl/fl and Trib1\_ASKO adipocytes. **d**,

78 ELISA for adiponectin in 4 hr conditioned media from 30 μM MG132 treated Trib1\_fl/fl and

79 Trib1\_ASKO adipocytes ( $n = 3$ ). Gene expression is depicted as mean ± s.e.m. All other data is

80 depicted as mean ± s.d. Significance in **(b)** determined by Student's *t* test, and significance in

81 **(d)** by 2-way ANOVA (Tukey's multiple correction) (ns = not significant, \* $p < 0.05$ , \*\* $p < 0.01$ ).

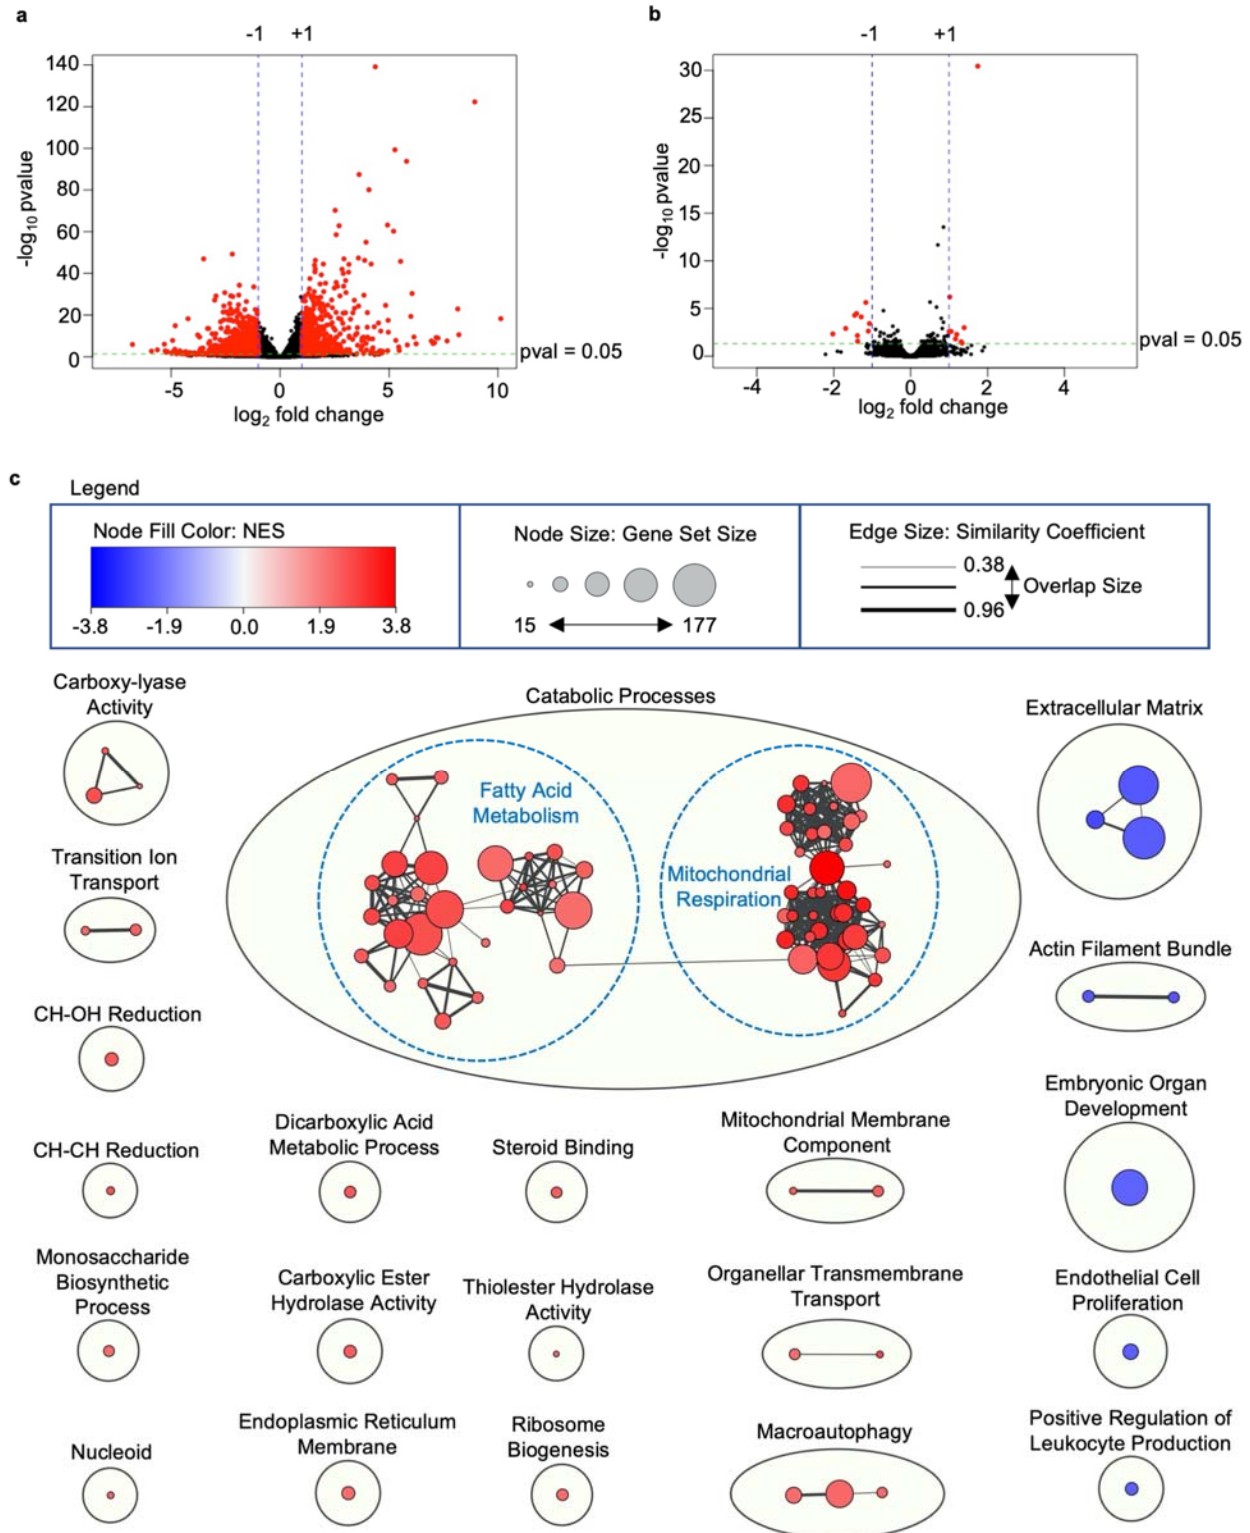

82

83 **Figure 6: Trib1\_ASKO adipocytes have widespread transcriptional changes in**

84 **mitochondrial and lipid metabolism pathways. a, Volcano plot of DESeq2 analysis of RNA-**

85 seq data from adipocytes isolated from scWAT from Trib1<sub>fl/fl</sub> and Trib1<sub>ASKO</sub> mice ( $n = 4$ ). **b**,  
86 Volcano plot of DESeq2 analysis of RNA-seq data from hepatocytes from Trib1<sub>fl/fl</sub> and  
87 Trib1<sub>ASKO</sub> mice ( $n = 4$ ). **c**, Cytoscape enrichment plot of Gene Set Enrichment Analysis  
88 (GSEA) of differentially expressed adipocyte genes ( $\text{padj} < 0.05$ ). Enrichment analysis and  
89 clustering were performed as described in the Methods section. Clusters upregulated in  
90 Trib1<sub>ASKO</sub> samples are shown in red, and clusters upregulated in Trib1<sub>fl/fl</sub> samples are  
91 shown in blue. Dashed blue outlines indicate larger clusters that were further subclustered  
92 manually to facilitate interpretation. NES = normalized enrichment score.  
93  
94

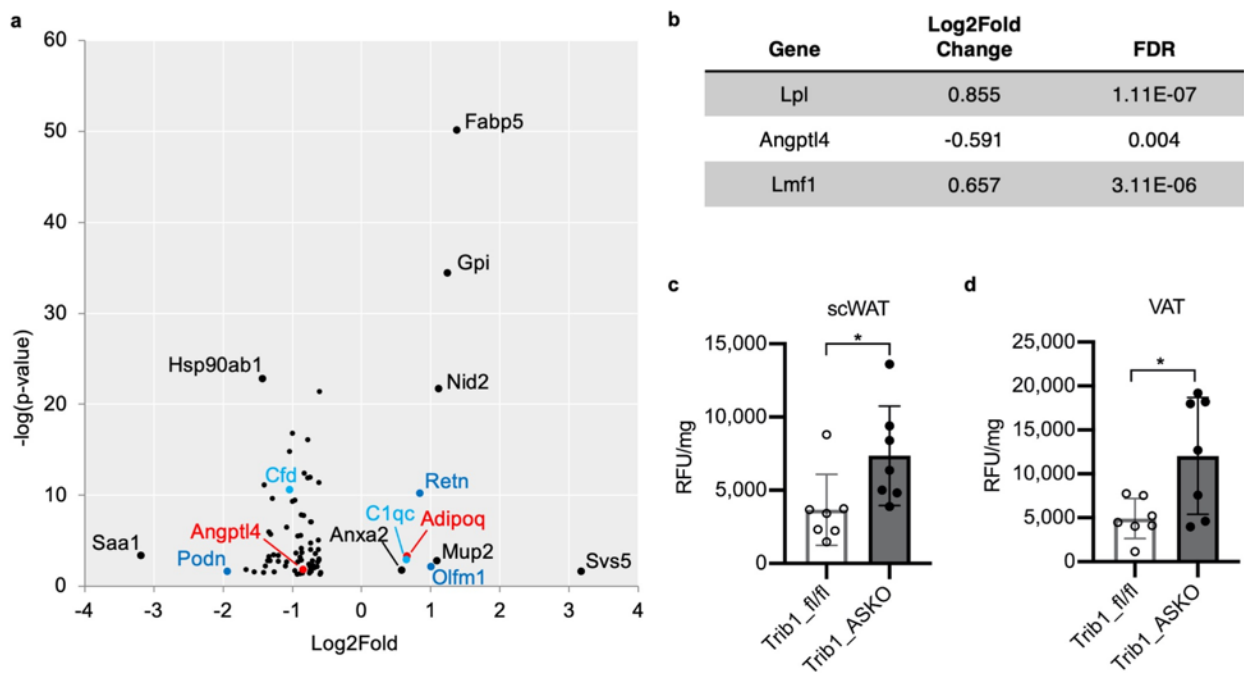

95  
96 **Figure 7: Trib1<sub>ASKO</sub> mice have increased adipose tissue lipoprotein lipase activity.** **a**,  
97 DIA proteomics data of conditioned media from Trib1<sub>ASKO</sub> vs. Trib1<sub>fl/fl</sub> scWAT explants ( $n =$   
98 3). Differential secretion was determined by Spectronaut analysis and results were filtered for  
99 secreted proteins (Uniprot keywords). Size and color of datapoints are for facilitating  
100 visualization. **b**, DESeq2 results for *Lpl*, *Angptl4*, and *Lmf1* from RNA-seq of Trib1<sub>fl/fl</sub> and

101 Trib1\_ASKO adipocytes. **c,d**, Lpl activity in scWAT (**c**) and VAT (**d**) extracts ( $n = 5$ ). Data  
102 depicted as mean  $\pm$  s.d. Significance in **c,d** determined by Student's  $t$  test (\* $p < 0.05$ ).
